# Supplementary material for: Eutrema EsMYB90 Gene Improves Growth and Antioxidant Capacity of Transgenic Wheat Under Salinity Stress
Source: Front Plant Sci. 2022 Apr 29;13:856163. doi: 10.3389/fpls.2022.856163 (PMC9102796; doi:10.3389/fpls.2022.856163)
Supplement: Supplementary file 5 [file Table_4.XLSX]

## Sheet:  Supplementary Table S4
	Supplementary Table S4_1. GST activities in leaves, leaf sheaths and roots of EsMYB90 transgenic wheat compared with wild type
	Tissues	Treatment	Line	Activity of GST (U/g•FW)
				Repeat1	Repeat2	Repeat3	Average	STDEV
	Leaf	CK	WT	0.7245	0.7245	0.7061	0.718367	0.0106232
			TL9	0.7268	0.7153	0.7176	0.7199	0.00608523
			TL30	0.799	0.788	0.792	0.793	0.00556776
		NaCl	WT	0.6463	0.6417	0.6394	0.642467	0.00351331
			TL9	0.9177	0.8993	0.8924	0.903133	0.0130784
			TL30	0.961	0.945	0.938	0.948	0.0117898
	sheath	CK	WT	1.15	1.1523	1.1569	1.15307	0.00351331
			TL9	1.5295	1.5387	1.5226	1.53027	0.00807733
			TL30	1.495	1.504	1.488	1.49567	0.00802081
		NaCl	WT	1.334	1.3179	1.3317	1.32787	0.00870766
			TL9	1.5755	1.5571	1.5479	1.56017	0.0140532
			TL30	1.572	1.556	1.547	1.55833	0.0126623
	Root	CK	WT	1.2742	1.2972	1.2811	1.28417	0.0118027
			TL9	1.2052	1.2029	1.2029	1.20367	0.00132791
			TL30	1.136	1.134	1.134	1.13467	0.0011547
		NaCl	WT	1.5042	1.4812	1.4858	1.4904	0.0121705
			TL9	1.7963	1.8009	1.8032	1.80013	0.00351331
			TL30	1.744	1.748	1.751	1.74767	0.00351188
	Supplementary Table S4_2. POD activities in leaves, leaf sheaths and roots of EsMYB90 transgenic wheat compared with wild type
	Tissues	Treatment	Line	Activity of POD (U/g•FW)
				Repeat1	Repeat2	Repeat3	Average	STDEV
	Leaf	CK	WT	94.5	91.5	96.5	94.1667	2.51661
			TL9	131	127.5	133	130.5	2.78388
			TL30	137.5	142.5	128	136	7.36546
		NaCl	WT	224.5	221	226.5	224	2.78388
			TL9	235.5	232	237.5	235	2.78388
			TL30	223.5	234.5	246	234.667	11.2509
	sheath	CK	WT	404.5	401	396.5	400.667	4.0104
			TL9	750	747.5	752	749.833	2.25462
			TL30	830.5	780.5	777.5	796.167	29.7714
		NaCl	WT	938.5	935	940.5	938	2.78388
			TL9	1089.5	1087	1091.5	1089.33	2.25462
			TL30	1140	1157	1167.5	1154.83	13.8774
	Root	CK	WT	655	651.5	657	654.5	2.78388
			TL9	859.5	856	861.5	859	2.78388
			TL30	878.5	937.5	883.5	899.833	32.7159
		NaCl	WT	1436	1432.5	1438	1435.5	2.78388
			TL9	1543	1590	1500	1544.33	45.0148
			TL30	1591	1595	1591	1592.33	2.3094
	Supplementary Table S4_3. MDA content in leaves, leaf sheaths and roots of EsMYB90 transgenic wheat compared with wild type
	Tissues	Treatment	Line	MDA content (μmol/g•FW)
				Repeat1	Repeat2	Repeat3	Average	STDEV
	Leaf	CK	WT	0.021229	0.021285	0.01935	0.0206213	0.00110136
			TL9	0.049642	0.049586	0.045127	0.0481183	0.00259072
			TL30	0.04493	0.044874	0.04106	0.0436213	0.00221836
		NaCl	WT	0.085876	0.090026	0.080463	0.085455	0.00479538
			TL9	0.061818	0.056602	0.052199	0.056873	0.00481522
			TL30	0.058788	0.054217	0.049814	0.054273	0.00448726
	sheath	CK	WT	0.00673	0.00802	0.00673	0.00716	0.000744782
			TL9	0.01273	0.014665	0.01273	0.013375	0.00111717
			TL30	0.010627	0.011917	0.010627	0.011057	0.000744782
		NaCl	WT	0.032955	0.034749	0.032366	0.0333567	0.00124124
			TL9	0.029819	0.029118	0.02665	0.028529	0.00166458
			TL30	0.027322	0.026621	0.024798	0.026247	0.0013029
	Root	CK	WT	0.003055	0.001765	0.00241	0.00241	0.000645
			TL9	0.002883	0.004874	0.004117	0.003958	0.00100498
			TL30	0.002798	0.004312	0.003976	0.00369533	0.000795066
		NaCl	WT	0.00583	0.009055	0.00712	0.007335	0.00162321
			TL9	0.005104	0.003814	0.003814	0.004244	0.000744782
			TL30	0.005104	0.004459	0.003814	0.004459	0.000645
	Supplementary Table S4_4. H2O2 content in leaves, leaf sheaths and roots of EsMYB90 transgenic wheat compared with wild type
	Tissues	Treatment	Line	H2O2 content (μmol/g•FW)
				Repeat1	Repeat2	Repeat3	Average	STDEV
	Root	CK	WT	39.2308	40.7692	42.3077	40.7692	1.53846
			TL9	35.3846	36.1538	36.1538	35.8974	0.444116
			TL30	34.6154	35.3846	35.3846	35.1282	0.444116
		NaCl	WT	84.6154	91.5385	78.4615	84.8718	6.54223
			TL9	54.6154	50.7692	59.2308	54.8718	4.23659
			TL30	53.8462	56.9231	68.4615	59.7436	7.70512
